# Supplementary material for: Effects of interfacial interaction on chain dynamics of rubber/graphene oxide hybrids: a dielectric relaxation spectroscopy study
Source: Royal Society of Chemistry journal article supplement (doi:10.1039/c3ra41998c), 2013-01-01
Supplement: c3ra41998c.pdf [file c3ra41998c.pdf]

## Supporting Information

# Effects of Interfacial Interaction on Chain Dynamics of Rubber/Graphene Oxide Hybrids: A Dielectric Relaxation Spectroscopy Study

Siwu Wu,<sup>a</sup> Zhenghai Tang,<sup>a</sup> Baochun Guo,<sup>a</sup> Liqun Zhang<sup>b</sup> and Demin Jia<sup>a</sup>

### Conductivities of VPR/GO hybrids

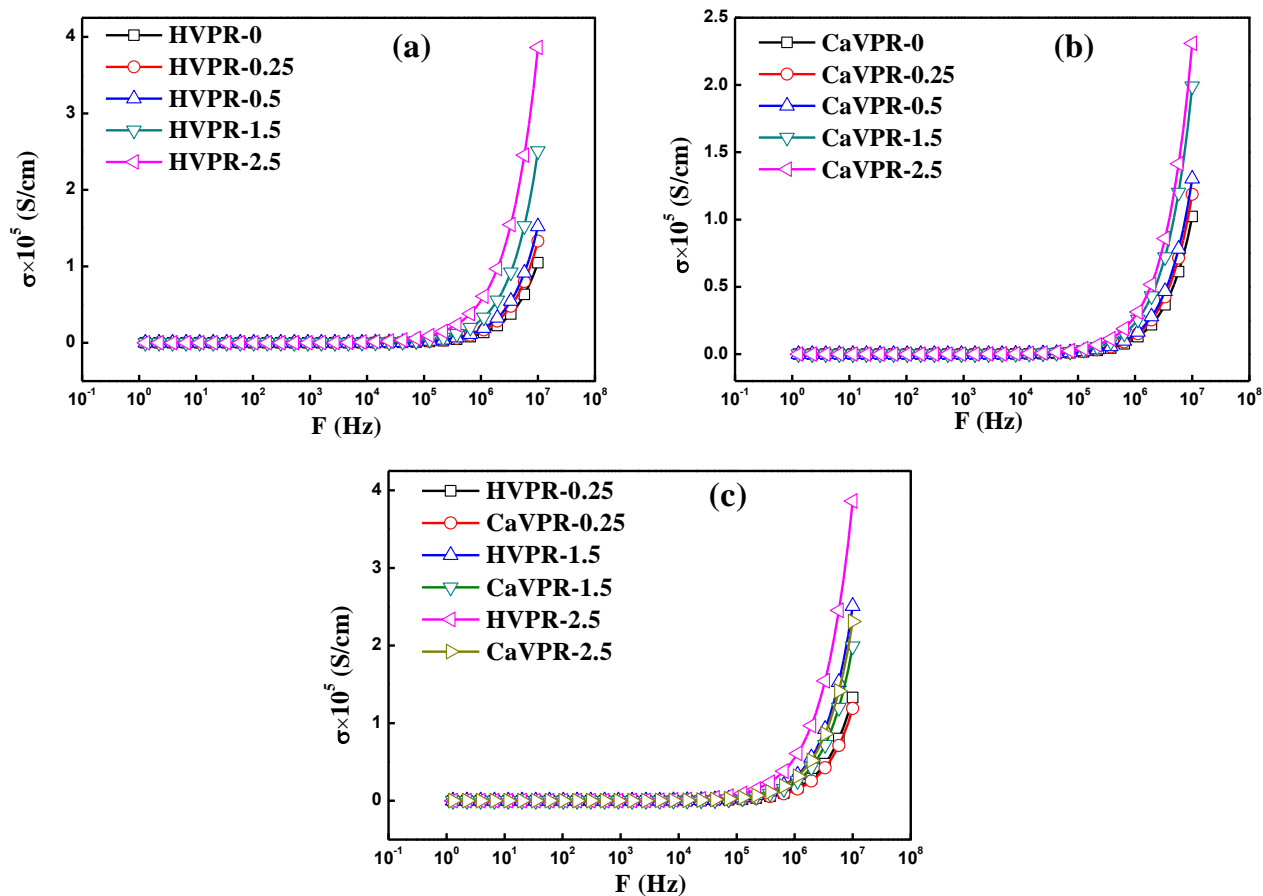

Fig. S1 Conductivities  $\sigma$  vs frequency of (a) HVPR, (b) CaVPR and (c) comparison of HVPR and CaVPR hybrids as a function frequency. Solid line is fitting by VFT function.
